# Supplementary material for: Agent‐Based Modeling in Systems Pharmacology
Source: PubMed Central journal article supplement (PMC4716580; doi:10.1002/psp4.12018), 2015-11-13
Supplement: PSP4-4-615-s001.pdf [file PSP4-4-615-s001.pdf]

```

package sim2d.cell.impl;

import java.util.Set;

import org.w3c.dom.Document;
import org.w3c.dom.Element;

import sim.engine.SimState;
import sim2d.TregSimulation;
import sim2d.cell.Cell;
import sim2d.cell.molecule.MHC_II_MBP;
import sim2d.compartment.Compartment;
import sim2d.molecule.MBP;
import sim2d.molecule.Molecule;
import sim2d.molecule.SDA;
import sim2d.molecule.Type1;

/**
 * Biologically speaking, MHC-II presentation is inducible on Macrophages, but is not presented as standard. However, MHC-II is not
 * explicitly represented here; for our purposes it is
 * redundant, because it's expression dynamics are entirely linked with the dynamics of MBP phagocytosis and expression.
 *
 * CNS Macrophages do not get licensed. Licensing is predominantly done with presentation to CD8+ T cells, and there are not MBP-
 * reactive CD8+ T cells in this
 * simulation. Activation of a CNS macrophage (by perception of type 1 cytokines (inf-g)) results in ability to express co-stims and mhc-ii.
 *
 * @author mark
 */
public class CNSMacrophage extends APC_Impl implements MHC_II_MBP
{
    /**
     * Properties of all CNS Macrophages
     */
    private static double phagocytosisProbabilityImmature; // the probability that an APC will phagocytose an
    apoptotic cell if the APC is immature.
    private static double phagocytosisProbabilityMature; // the probability that an APC will phagocytose an
    apoptotic cell if the APC is mature.

    private static double type1RequiredForActivation; // the quantity of type 1 cytokines that
    must be perceived for (an MHC-expressing) APC to express costim molecules.

    private static double sdaSecretedPerHourWhenStimulated; // the quantity of SDA molecules secreted every
    hour when this CNSMacrophage is stimulated.
    private static double sdaSecretedPerTimeslice; // the quantity of SDA
    molecules secreted every timestep when this CNSM is stimulated.

    private static double basalMBPExpressionProbability; // the proportion (range 0 - 1.0 ) of CNSM's that,
    at start of simulation, express MHC-II-MBP.

    /**
     * properties of CNS Macrophage instances
     */
    private boolean canExpressMBP = false;
    private boolean canExpressCoStim = false;
    private boolean stimulated = false;
    // this is set to true when the CNS M becomes stimulated through receipt of type 1 cytokines.

    /**
     * Constructor creates a completely naive CNSMacrophage. A certain proportion of all new CNSMacrophages are started in a
     * state that presents MBP, this is to reflect the fact that
     * there will always be some MBP presentation in the CNS. It is also a requirement for the start of EAE, because without local
     * activation the T cells will never perform effector function
     * in the CNS.
     */
    public CNSMacrophage(Compartment location)
    {
        super(location);

        if(TregSimulation.sim.random.nextDouble() <= basalMBPExpressionProbability)
        {
            // set up such that CNSM is able to present to Th1 and Th2 cells
            this.canExpressMBP = true;
        }
    }
}

```

```

        this.canExpressCoStim = true;
        this.setTimeToDeath();

        // set up such that CNSM is not activated and secreting SDA
        this.stimulated = false;           // this is default, but repeated for clarity.
    }
}

/**
 * Constructor should be used to create the initial population of CNSMs in the simulation, and should not be used during the
 * simulation's run. It sets up the initial population such that it appears that
 * the simulation has been running for a while, rather than just being run. This involves setting timer values of cells to random
 * settings within their normal range, rather than starting them all off from
 * the same point, which will create periodic artefacts in the simulation's run.
 */
public static CNSMacrophage createInitialCNSMacrophage(Compartment location)
{
    normal CNSM.           CNSMacrophage cnsm = new CNSMacrophage(location);           // create a
simulation run.           // pick a time of death that lies somewhere in the range of now and what would have been chosen in a normal
                           cnsm.timeOfDeath = calculateAbsoluteTimeOfDeath() * TregSimulation.sim.random.nextDouble();
                           return cnsm;
}

/**
 * Implements any functionality required when a DC goes from an immature state to either tolerogenic or immunogenic.
 */
protected void becomeNonImmature()
{
    cell will expire some time after it migrates.           setTimeToDeath();           // the
}

/**
 * Method handles the secretion of cytokines by this cell into the compartment that this cell occupies.
 */
protected void secreteCytokines()
{
    secrete SDA.           if(stimulated)           // if the CNS M has been stimulated (through receipt of type 1 cytokines) then it will
                           {
                               compartment.receiveSecretedMolecules(SDA.instance, sdaSecretedPerTimeslice, this);
                           }
}

/**
 * Returns true when the APC is both capable of expressing MHC-II molecules and contains the MBP peptide.
 */
public boolean getExpressing_MHC_II_MBP()
{
    // note that we are assuming here that MHC-II expression is constitutive.
    return canExpressMBP;
}

public boolean getExpressing_CoStimulatory()
{
    return canExpressCoStim;
}

/**
 * Returns true if this APC is expressing any MHC molecules.
 */
public boolean expressingMHC()
{
    is the only form of MHC-peptide expressed by CNS macrophages.           return getExpressing_MHC_II_MBP();           // this
}

/**
 * This method handles the perception of cytokines within the compartment.
 *
 * there are the following options (taking costim expression as an example)

```

```

*
* expressing costim? || awaiting expression of costim?
* no || no => set time to express
* no || yes => do nothing (definitely do not set back the time to expression!)
* yes || no => relicensing, set time to unexpression further back (reset it)
* yes || yes => this should not be possible, time to expression is set to inf. when it passes.
*/
protected void perceiveMolecules(TregSimulation sim)
{
    double quantity = compartment.getConcentrationMolecule(Type1.instance, this);
    if(quantity >= type1RequiredForActivation) // if there are enough type1 cytokines, and if the APC is expressing
MHC, then become licensed for costims.
    {
        /*
        * This is done even if the cell is not expressing MHC to prevent a never starting loop. CNS Macrophages
will only express mhc if they phagocytose
        * a CNS cell. CNS cells only die when there is SDA around, and if the only cells that secrete SDA are
CNS macrophages then the loop never starts.
        */
        stimulated = true;
        // this means the CNS Macrophage will start to secrete SDA
        becomeNonImmature();
        // this call only sets a time to death, but we call it here for consistency. It does not upregulate co-stims.
        // receipt of type 1 cytokines allows cell to express co-stim molecules.
        if(canExpressCoStim == false && expressingMHC() == true)
        {
            canExpressCoStim = true;
        }
    }
}

/**
* Called when an APC is to phagocytose another (given) cell. This method is not responsible for removing the cell from the
compartment, that is
* handled by cell.driveMHCPresentableMolecules, which also returns the molecules that are MHC presentable from the
apoptotic cell.
*/
public void phagocytoseCell(TregSimulation sim, Cell cell)
{
    if( cell.isApoptotic() == false || cell.isDead()) // do nothing if the cell is not apoptotic, or if it has
already been phagocytosed (but not yet removed from the simulation)
        return;

    if( isApoptotic)
        return;
    // dead APCs can't phagocytose anything.

    /* APCs that are stimulated (and express MHC) are less likely to phagocytose other cells. */
    double probOfPhagocytosis = phagocytosisProbabilityImmature;
    if(expressingMHC()) // if
DC is expressing MHC molecules (ie, it is stimulated)
        probOfPhagocytosis = phagocytosisProbabilityMature;

    if(sim.random.nextDouble() >= probOfPhagocytosis) // if we are unstimulated (no MHC) then we will continue, if
we are stimulated then there is a high chance that we will not phagocytose this cell.
        return;

    Set<Molecule> presentable = cell.bePhagocytosised(sim);
    if(presentable == null)
        return;
    // the phagocytosed cell contained no presentable peptides.

    /* anything UPTO 'probabilityPhagocytosisToPeptide' will result in peptides being derived. Else, save computation
time and return now instead. */
    if(sim.random.nextDouble() >= probabilityPhagocytosisToPeptide)
        return;

    performPhagocytosisOfCell(presentable);
}

/**
* Handles the actual phagocytosis of a cell. It is protected, so it cannot be an entry point for the phagocytosis behaviour; there
are guards that need to be checked first, and these

```

```

    * are handled in 'phagocytoseCell'. Here the molecules in 'presentable' are examined and CNSMacrophage specific behaviours
    are created in this method.
    */
    protected void performPhagocytosisOfCell(Set<Molecule> presentable)
    {
        if(presentable.contains(MBP.instance)) // check if the cell contains MBP.
        {
            if(canExpressMBP == false) // if molecule not
            already being expressed.
            {
                canExpressMBP = true;
                setTimeToDeath();
            }
        }
    }

    /**
    * Method handles events and behaviours required to put the cell into an apoptotic state.
    */
    protected void becomeApoptotic()
    {
        timeOfDeath = Double.MAX_VALUE;
        // reset clock to infinity.
        /* stop this cell from interacting with others */
        isApoptotic = true;

        // replace this cell with another immature one. // homeostatic
        replacement of dead cells with immature ones.
        new CNSMacrophage(this.compartment);

        TregSimulation.sim.removeFromSimulationSchedule(this); // critical, remove this cell from the
        simulation's schedule.
        compartment.removeCellFollowingDeath(this); // remove
        yourself from the compartment.
    }

    /**
    * T Cells handle interactions with APCs, so they donot appear here.
    */
    protected void interactWithOtherCell(TregSimulation sim, Cell otherCell)
    {
        if(otherCell instanceof APC_Impl && otherCell.isApoptotic()) // only deal with APCs here, T cells
        instigate this though their own step functions.
            phagocytoseCell(sim, otherCell);
    }

    public boolean isImmature()
    {
        return (expressingMHC() == false) && (getExpressing_CoStimulatory() == false) && (isApoptotic() == false);
    }

    public boolean isTolerogenic()
    {
        return expressingMHC() && (getExpressing_CoStimulatory() == false);
    }

    public boolean isImmunogenic()
    {
        return getExpressing_CoStimulatory();
    }

    public boolean isMobile()
    {
        if(isImmature() && (stimulated == false))
            return false;

        return true;
        // all other states result in CNSM mobility.
    }

    /**
    * Returns true when this cell is apoptotic.
    */

```

```

public boolean isApoptotic()
{
    return isApoptotic;
    // Dendritic Cells do not become Apoptotic.
}

/**
 * Returns true when this cell has been phagocytosed, to prevent it being phagocytosed again in the same timestep. However,
since these cells are immediately removed from
 * the simulation upon becoming apoptotic, this method is redundant here, and hence always returns false;
 */
public boolean isDead()
{
    return false;
}

/**
 * When this cell leaves an immature state, and starts to express MHC molecules (and potentially co-stims too) then its time of
death must be set.
 * Non-immature APCs do not live forever.
 */
private void setTimeToDeath()
{
    if(timeOfDeath != Double.MAX_VALUE)
// time of death is already set.
        return;

    timeOfDeath = calculateAbsoluteTimeOfDeath();
}

/**
 * Java bean getters and setters.
 */
public double getTimeOfDeath()
{
    return timeOfDeath;
}

public boolean getExpressingMBP()
{
    return canExpressMBP;
}

public boolean isExpressing_MHCPeptide()
{
    return (canExpressMBP);
}

protected double getPhagocytosisProbabilityImmature()
{
    return phagocytosisProbabilityImmature;
}

protected double getPhagocytosisProbabilityMature()
{
    return phagocytosisProbabilityMature;
}

/**
 * Given the parameters.xml file (represented as a 'Document') this method loads the relevant default values for this class.
 * @param params
 */
public static void loadParameters(Document params)
{
    Element pE = (Element) params.getElementsByTagName("CNSMacrophage").item(0);

    phagocytosisProbabilityImmature =
Double.parseDouble(pE.getElementsByTagName("phagocytosisProbabilityImmature").item(0).getTextContent());
    phagocytosisProbabilityMature =
Double.parseDouble(pE.getElementsByTagName("phagocytosisProbabilityMature").item(0).getTextContent());

    basalMBPEXpressionProbability =
Double.parseDouble(pE.getElementsByTagName("basalMBPEXpressionProbability").item(0).getTextContent());

    typeIRequiredForActivation =
Double.parseDouble(pE.getElementsByTagName("typeIRequiredForActivation").item(0).getTextContent());

    sdaSecretedPerHourWhenStimulated =
Double.parseDouble(pE.getElementsByTagName("sdaSecretedPerHourWhenStimulated").item(0).getTextContent());
    sdaSecretedPerTimeslice = sdaSecretedPerHourWhenStimulated * TregSimulation.sim.timeSlice;
}
}

```
